# Supplementary material
Source: PubMed Central journal article supplement (PMC2665101)

## Supplementary figure legends

### S1.

(A) Microscopic pictographs of HeLa cells stably expressing Htt-GFP with NES (upper columns) or NLS (lower columns) containing various Q stretches (left Q = 25, middle Q = 46, and right Q = 72) by GFP direct fluorescence. Scale bar = 20  $\mu$ m. Representative IBs are shown by arrows.

(B) Immunoblot of stable NES and NLS HeLa cell lines. Htt-GFP expression was detected by anti-GFP antibody.

(C) Filter retardation assay of NES and NLS HeLa stable cell lines. Htt-GFP aggregates retained on cellulose acetate membrane were detected by anti-GFP antibody.

(D) San1p ubiquitylates Htt. FLAG-tagged San1p was cotransfected with HA-tagged ubiquitin to NLSQ25, NLSQ46, and NLSQ72 cells for 48 h. After an additional 4 h of 5- $\mu$ M MG-132 treatment, cell lysates were immunoprecipitated by anti-GFP antibody and subjected to immunoblots by anti-HA antibody.

(E) Expression of various UHRF-2s in HeLa cells was detected with indirect immunofluorescence by anti-FLAG antibody and Alexa 488 secondary antibody (upper panels). Wt (left panels) and RING mutant (middle panels) showed nuclear localization.  $\Delta$ NLS mutant was expressed at the cytoplasm (right panels). Lower panels show nuclear staining by SYTOX orange. Scale bar = 20  $\mu$ m.

### S2.

(A) Recombinant RING domain mutant lacks *in vitro* ligase activity. Anti-FLAG immunoblot of the postreaction mixture is shown to detect ubiquitylation.

(B) UHRF-2  $\Delta$ NLS retains *in vitro* ligase activity. Anti-FLAG immunoblot of the postreaction mixture is shown to detect ubiquitylation.

(C) Soluble amount of Htt-GFP was measured upon UHRF-2 expression. Immunoblot analysis (upper bands) and its band intensity measurement revealed little effect of UHRF-2 on soluble amount of Htt-GFP. Bars indicate SE.

(D) Anti-UHRF-2 antibody specifically recognizes UHRF-2. Specificity of anti-UHRF-2 antibody raised in rabbits was evaluated by immunoblot of recombinant UHRF-1 and UHRF-2. The right panel shows immunoblot by anti-His antibody; the left panel shows immunoblot by anti-UHRF-2 antibody.

(E) Anti-UHRF-2 antibody recognizes endogenous UHRF-2. HeLa cell lysate was subjected to immunoblot by anti-UHRF-2 antibody. Arrow indicates UHRF-2.

(F) UHRF-2 accelerates DRPLA degradation. Wt or RING domain mutant (C735S) UHRF-2 was overexpressed with DRPLAQ19 or DRPLAQ80 in 293T cells and a pulse chase experiment was performed after 48 h. Relative band intensities from SDS-PAGE were normalized to 100% at time = 0 and plotted onto semi-log charts with fitted lines (wt: straight line; C735S: broken line) to calculate the half-life of the proteins. Bars indicate SE.

(G) UHRF-2 antibody recognizes mouse endogenous UHRF-2. Cell lysates from mouse neuro2a cells or human HeLa cells were subjected to immunoblot. The left panel shows immunoblot with peptide-absorbed antibody (peptide +). The right panel shows immunoblot with the antibody (peptide  $\Delta$ ). Arrow indicates endogenous UHRF-2.

Figure S1

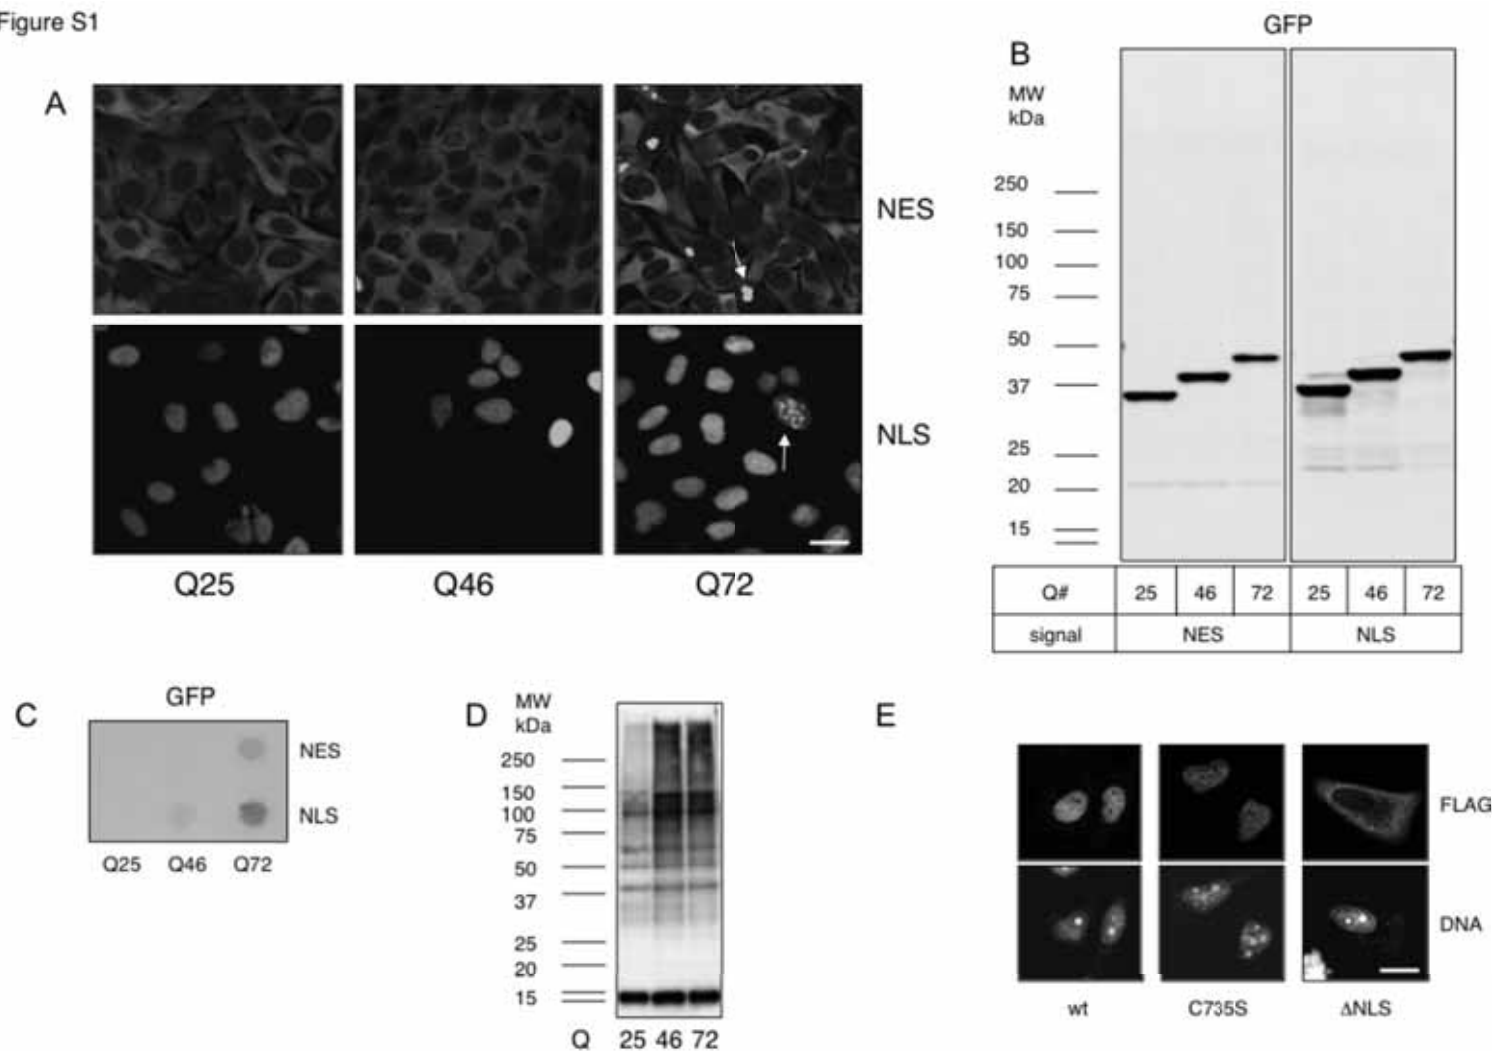

Figure S2

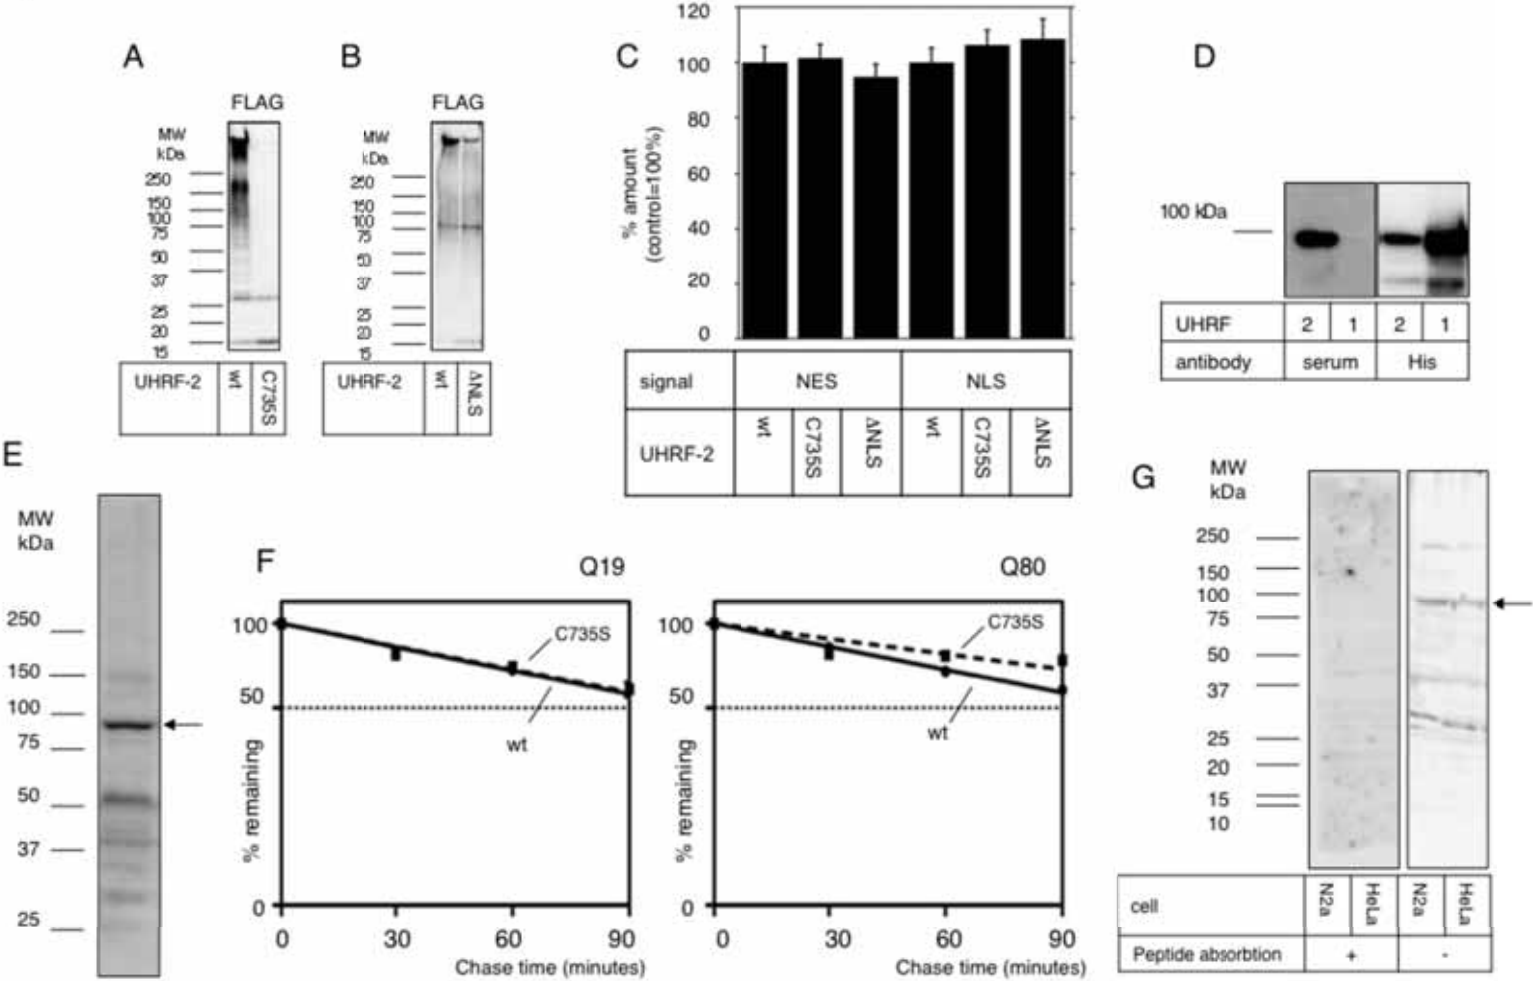

Supplement: M809739200_1.pdf [file M809739200_1.pdf]
